# Supplementary material
Source: PubMed Central journal article supplement (PMC4552490)
Supplement: embr0016-0975-sd2.pdf [file embr0016-0975-sd2.pdf]

Manuscript EMBOR-2014-39951

## **PARD3 Induces TAZ Activation and Cell Growth by Promoting LATS1 and PP1 Interaction**

Xianbo Lv, Chen-Ying Liu, Zhen Wang, Yi-Ping Sun, Yue Xiong, Qun-Ying Lei and Kun-Liang Guan

*Corresponding authors: Kun-Liang Guan, Yue Xiong and Qun-Ying Lei, Fudan University, Shanghai*

---

### **Review timeline:**

Submission date:

04 December 2014

Accepted:

26 May 2015

---

### **Transaction Report:**

No Peer Review Process File is available with this article, as the authors have chosen not to make the review process public in this case.
